# Supplementary figures and images for: (−)-Epigallocatechin-3-gallate mitigates cyclophosphamide-induced intestinal injury by modulating the tight junctions, inflammation and dysbiosis in mice
Source: Royal Society of Chemistry journal article supplement (doi:10.1039/d1fo01848e), 2021-01-01

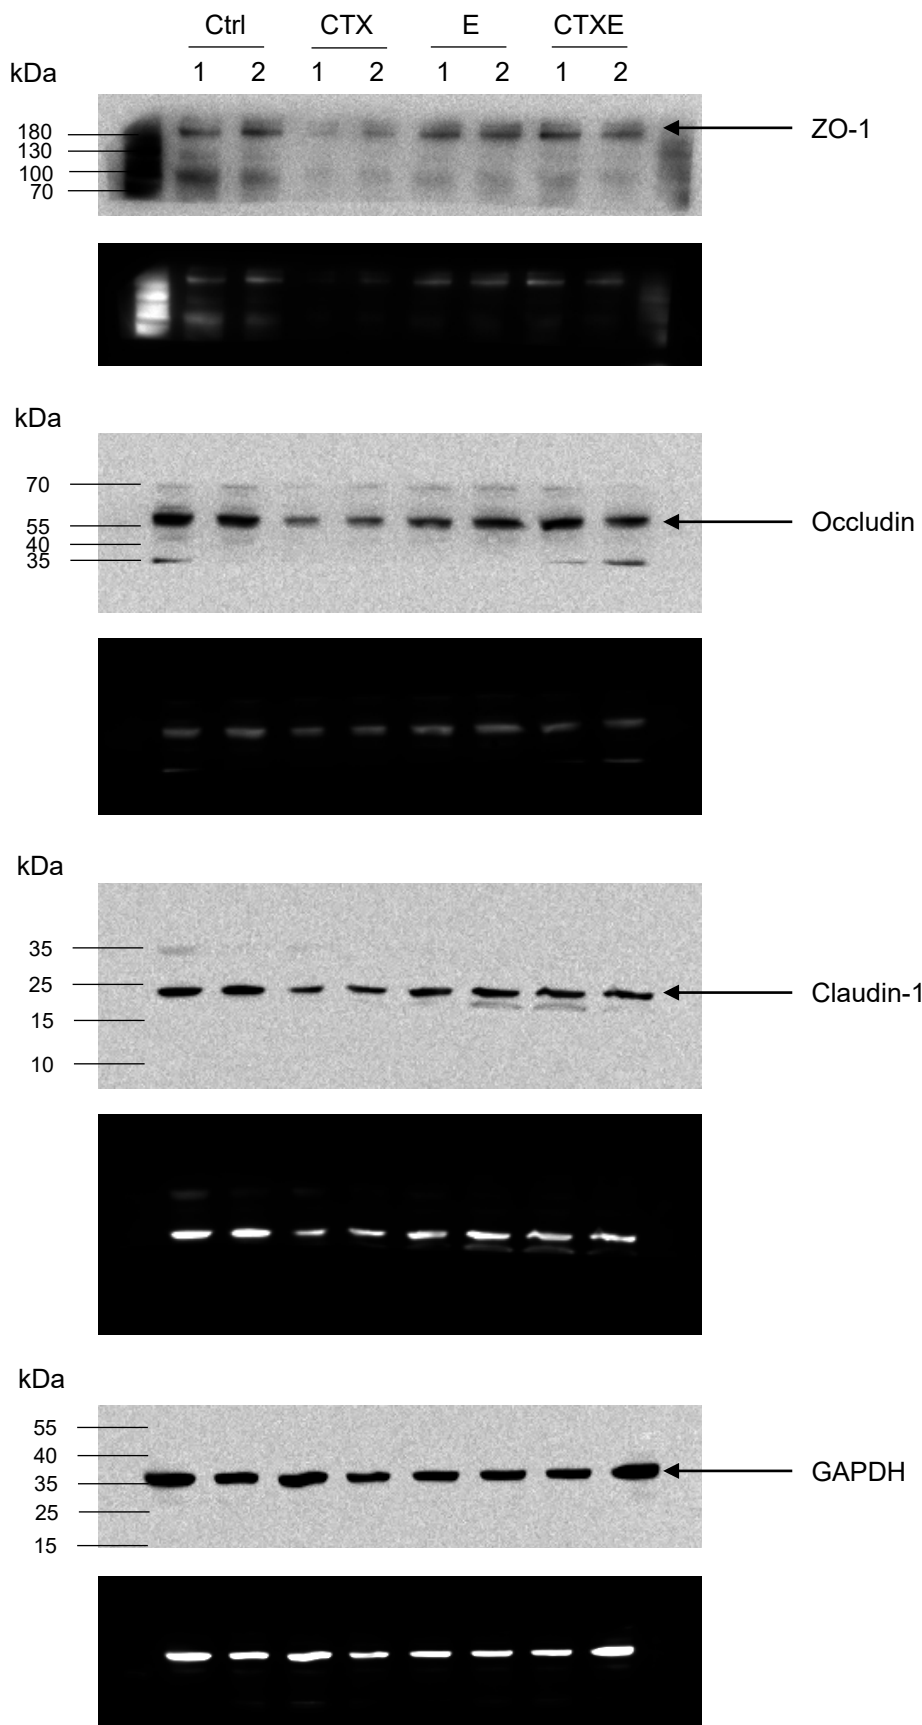

Supplement: d1fo01848e1.pdf [file d1fo01848e1.pdf]
